# Supplementary material
Source: PubMed Central journal article supplement (PMC6572093)
Supplement: f-75-00461-sup1.pdf [file f-75-00461-sup1.pdf]

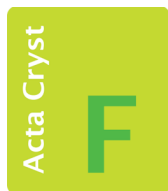

STRUCTURAL BIOLOGY  
COMMUNICATIONS

**Volume 75 (2019)**

**Supporting information for article:**

**Changes in the allosteric site of human liver pyruvate kinase upon activator binding include the breakage of an intersubunit cation– $\pi$  bond**

**Jeffrey S. McFarlane, Trey A. Ronnebaum, Kathleen M. Meneely, Annemarie Chilton, Aron W. Fenton and Audrey L. Lamb**

**Table S1** Structural Alignments of Monomers

| Variant | C436M     | D499N     | W527H     | GGG       | S531E     |
|---------|-----------|-----------|-----------|-----------|-----------|
| C436M   | X         | 0.27-0.48 | 0.37-0.6  | 0.47-2.23 | 0.44-1.92 |
| D499N   | 0.27-0.48 | X         | 0.27-0.48 | 0.37-0.60 | 0.41-0.69 |
| W527H   | 0.37-0.6  | 0.27-0.48 | X         | 0.42-0.61 | 0.42-0.65 |
| GGG     | 0.47-2.23 | 0.37-0.60 | 0.42-0.61 | X         | 0.4-1.82  |
| S531E   | 0.44-1.92 | 0.41-0.69 | 0.42-0.65 | 0.4-1.82  | X         |

Rmsd values are reported in Å for alignments over the full length of each monomer. Ranges demonstrate the variation in rmsd values for the alignment of different monomers. Alignments performed by PDBeFold.

**Table S2** Structural Alignments of Tetramers

| Variant | D499N | W527H | GGG  | S531E |
|---------|-------|-------|------|-------|
| D499N   | X     | 0.47  | 1.44 | 1.45  |
| W527H   | 0.47  | X     | 1.35 | 1.69  |
| GGG     | 1.44  | 1.35  | X    | 1.73  |
| S531E   | 1.45  | 1.69  | 1.73 | X     |

Rmsd values are reported in Å for alignments over the full length of the A and C domains for each tetramer (excluding the B domain, residues 130-230). Alignments performed using the combinatorial extension (CE) algorithm in PyMOL.

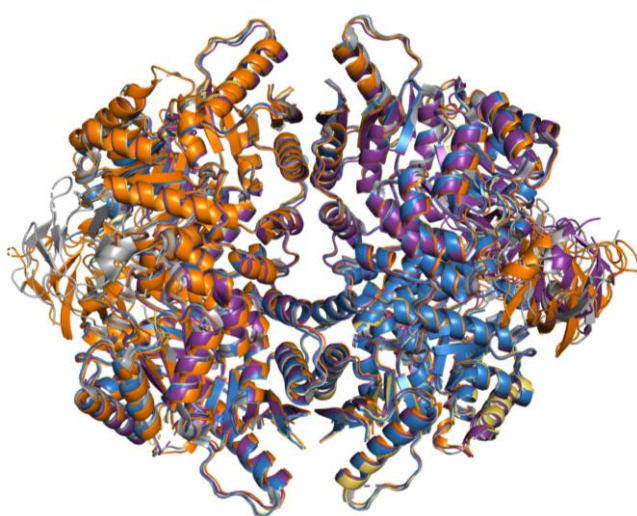

**Figure S1** Tetramer Overlays. Overlay of D499N (blue), W527H (yellow), GGG (orange), S531E (purple) and C436M (gray) demonstrating high structural homology for the A and C domains.

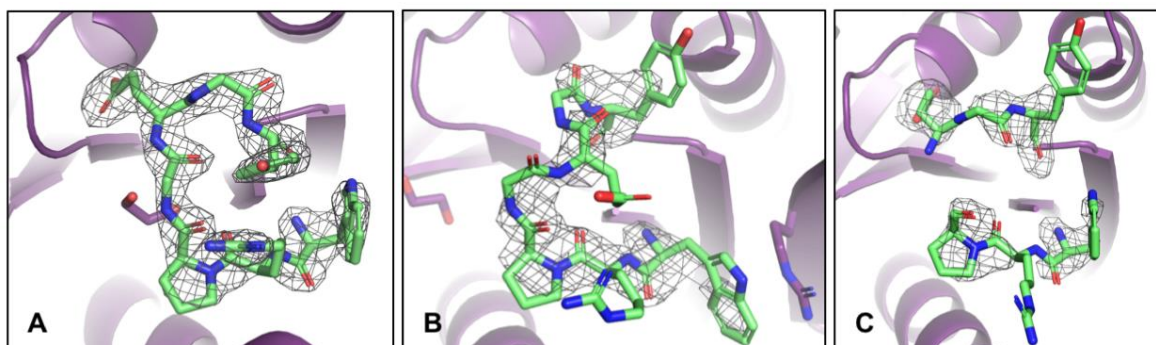

**Figure S2** Conformational variation of the S531E allosteric loop. A. Chain C showing S531E bound in the 6' phosphate binding site. Wireframe is a  $mF_o-DF_c$  omit map contoured  $4.0 \sigma$ . B. Chain B showing the allosteric loop sampling an open conformation with partial occupancy. Wireframe is a  $mF_o-DF_c$  omit map contoured  $3.0 \sigma$ . C. Chain F showing incomplete density for the allosteric loop in a closed conformation. Wireframe is a  $mF_o-DF_c$  omit map contoured  $3.0 \sigma$ .

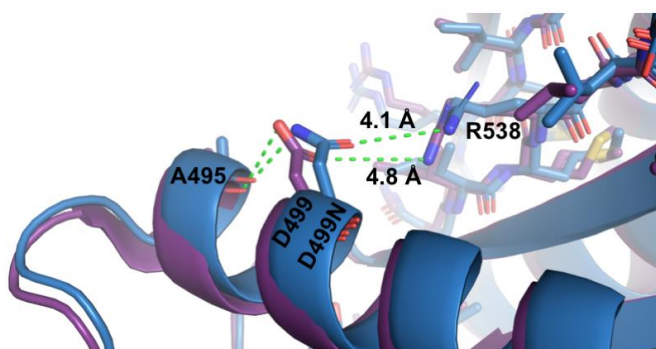

**Figure S3** Comparison of D499N and C436M C-C interface. Overlay of C436M (purple) and D499N (blue) showing the position of residue 499. Alignment is of the AC domains and was performed by PDBeFold.
